# Supplementary material for: Accounting for GC-content bias reduces systematic errors and batch effects in ChIP-seq data
Source: HighWire-hosted journal article supplement (doi:10.1101/gr.220673.117), 2017-10-12
Supplement: Supplemental_Table_S1.xlsx [file Supplemental_Table_S1.xlsx]

## Sheet: Sheet1
Supplemental Table S1. Description of ENCODE ChIP-seq samples used in this paper. The laboratory information is collected from the dataset downloaded from UCSC data portal, where the name of 'SYDN' might be different in ENCODE portal as 'Stanford 'or 'USC'.
Accession ID	Laboratory	Replicate	Cell Line	Transcription Factor	UCSC ENCODE data link
ENCFF000BRG	Broad	rep1	HUVEC	CTCF	ftp://hgdownload.cse.ucsc.edu/goldenPath/hg19/encodeDCC/wgEncodeBroadHistone/wgEncodeBroadHistoneHuvecCtcfStdRawDataRep1.fastq.gz
ENCFF000BRD	Broad	rep2	HUVEC	CTCF	ftp://hgdownload.cse.ucsc.edu/goldenPath/hg19/encodeDCC/wgEncodeBroadHistone/wgEncodeBroadHistoneHuvecCtcfStdRawDataRep2.fastq.gz
ENCFF000RVE	UTA	rep1	HUVEC	CTCF	ftp://hgdownload.cse.ucsc.edu/goldenPath/hg19/encodeDCC/wgEncodeOpenChromChip/wgEncodeOpenChromChipHuvecCtcfRawDataRep1.fastq.gz
ENCFF000RVI	UTA	rep2	HUVEC	CTCF	ftp://hgdownload.cse.ucsc.edu/goldenPath/hg19/encodeDCC/wgEncodeOpenChromChip/wgEncodeOpenChromChipHuvecCtcfRawDataRep2.fastq.gz
ENCFF001HSL	UW	rep1	HUVEC	CTCF	ftp://hgdownload.cse.ucsc.edu/goldenPath/hg19/encodeDCC/wgEncodeUwTfbs/wgEncodeUwTfbsHuvecCtcfStdRawDataRep1.fastq.gz
ENCFF001HSN	UW	rep2	HUVEC	CTCF	ftp://hgdownload.cse.ucsc.edu/goldenPath/hg19/encodeDCC/wgEncodeUwTfbs/wgEncodeUwTfbsHuvecCtcfStdRawDataRep2.fastq.gz
ENCFF000ARV	Broad	rep1	GM12878	CTCF	ftp://hgdownload.cse.ucsc.edu/goldenPath/hg19/encodeDCC/wgEncodeBroadHistone/wgEncodeBroadHistoneGm12878CtcfStdRawDataRep1.fastq.gz
ENCFF000ARP	Broad	rep2	GM12878	CTCF	ftp://hgdownload.cse.ucsc.edu/goldenPath/hg19/encodeDCC/wgEncodeBroadHistone/wgEncodeBroadHistoneGm12878CtcfStdRawDataRep2.fastq.gz
ENCFF000ROU	UTA	rep1	GM12878	CTCF	ftp://hgdownload.cse.ucsc.edu/goldenPath/hg19/encodeDCC/wgEncodeOpenChromChip/wgEncodeOpenChromChipGm12878CtcfRawDataRep1.fastq.gz
ENCFF000ROZ	UTA	rep2	GM12878	CTCF	ftp://hgdownload.cse.ucsc.edu/goldenPath/hg19/encodeDCC/wgEncodeOpenChromChip/wgEncodeOpenChromChipGm12878CtcfRawDataRep2.fastq.gz
ENCFF000ROX	UTA	rep3	GM12878	CTCF	ftp://hgdownload.cse.ucsc.edu/goldenPath/hg19/encodeDCC/wgEncodeOpenChromChip/wgEncodeOpenChromChipGm12878CtcfRawDataRep3.fastq.gz
ENCFF001HHX	UW	rep1	GM12878	CTCF	ftp://hgdownload.cse.ucsc.edu/goldenPath/hg19/encodeDCC/wgEncodeUwTfbs/wgEncodeUwTfbsGm12878CtcfStdRawDataRep1.fastq.gz
ENCFF001HIA	UW	rep2	GM12878	CTCF	ftp://hgdownload.cse.ucsc.edu/goldenPath/hg19/encodeDCC/wgEncodeUwTfbs/wgEncodeUwTfbsGm12878CtcfStdRawDataRep2.fastq.gz
ENCFF000BAS	Broad	rep1	HeLa-S3	CTCF	ftp://hgdownload.cse.ucsc.edu/goldenPath/hg19/encodeDCC/wgEncodeBroadHistone/wgEncodeBroadHistoneHelas3CtcfStdRawDataRep1.fastq.gz
ENCFF000BAT	Broad	rep2	HeLa-S3	CTCF	ftp://hgdownload.cse.ucsc.edu/goldenPath/hg19/encodeDCC/wgEncodeBroadHistone/wgEncodeBroadHistoneHelas3CtcfStdRawDataRep2.fastq.gz
ENCFF000RTA	UTA	rep1	HeLa-S3	CTCF	ftp://hgdownload.cse.ucsc.edu/goldenPath/hg19/encodeDCC/wgEncodeOpenChromChip/wgEncodeOpenChromChipHelas3CtcfRawDataRep1.fastq.gz
ENCFF000RTC	UTA	rep2	HeLa-S3	CTCF	ftp://hgdownload.cse.ucsc.edu/goldenPath/hg19/encodeDCC/wgEncodeOpenChromChip/wgEncodeOpenChromChipHelas3CtcfRawDataRep2.fastq.gz
ENCFF001HNI	UW	rep1	HeLa-S3	CTCF	ftp://hgdownload.cse.ucsc.edu/goldenPath/hg19/encodeDCC/wgEncodeUwTfbs/wgEncodeUwTfbsHelas3CtcfStdRawDataRep1.fastq.gz
ENCFF001HNP	UW	rep2	HeLa-S3	CTCF	ftp://hgdownload.cse.ucsc.edu/goldenPath/hg19/encodeDCC/wgEncodeUwTfbs/wgEncodeUwTfbsHelas3CtcfStdRawDataRep2.fastq.gz
ENCFF000BED	Broad	rep1	HepG2	CTCF	ftp://hgdownload.cse.ucsc.edu/goldenPath/hg19/encodeDCC/wgEncodeBroadHistone/wgEncodeBroadHistoneHepg2CtcfStdRawDataRep1.fastq.gz
ENCFF000BEI	Broad	rep2	HepG2	CTCF	ftp://hgdownload.cse.ucsc.edu/goldenPath/hg19/encodeDCC/wgEncodeBroadHistone/wgEncodeBroadHistoneHepg2CtcfStdRawDataRep2.fastq.gz
ENCFF000RUI	UTA	rep1	HepG2	CTCF	ftp://hgdownload.cse.ucsc.edu/goldenPath/hg19/encodeDCC/wgEncodeOpenChromChip/wgEncodeOpenChromChipHepg2CtcfRawDataRep1.fastq.gz
ENCFF000RUJ	UTA	rep2	HepG2	CTCF	ftp://hgdownload.cse.ucsc.edu/goldenPath/hg19/encodeDCC/wgEncodeOpenChromChip/wgEncodeOpenChromChipHepg2CtcfRawDataRep2.fastq.gz
ENCFF001HNT	UW	rep1	HepG2	CTCF	ftp://hgdownload.cse.ucsc.edu/goldenPath/hg19/encodeDCC/wgEncodeUwTfbs/wgEncodeUwTfbsHepg2CtcfStdRawDataRep1.fastq.gz
ENCFF001HNU	UW	rep2	HepG2	CTCF	ftp://hgdownload.cse.ucsc.edu/goldenPath/hg19/encodeDCC/wgEncodeUwTfbs/wgEncodeUwTfbsHepg2CtcfStdRawDataRep2.fastq.gz
ENCFF000BWM	Broad	rep1	K562	CTCF	ftp://hgdownload.cse.ucsc.edu/goldenPath/hg19/encodeDCC/wgEncodeBroadHistone/wgEncodeBroadHistoneK562CtcfStdRawDataRep1.fastq.gz
ENCFF000BWR	Broad	rep2	K562	CTCF	ftp://hgdownload.cse.ucsc.edu/goldenPath/hg19/encodeDCC/wgEncodeBroadHistone/wgEncodeBroadHistoneK562CtcfStdRawDataRep2.fastq.gz
ENCFF000RWH	UTA	rep1	K562	CTCF	ftp://hgdownload.cse.ucsc.edu/goldenPath/hg19/encodeDCC/wgEncodeOpenChromChip/wgEncodeOpenChromChipK562CtcfRawDataRep1.fastq.gz
ENCFF000RWK	UTA	rep2	K562	CTCF	ftp://hgdownload.cse.ucsc.edu/goldenPath/hg19/encodeDCC/wgEncodeOpenChromChip/wgEncodeOpenChromChipK562CtcfRawDataRep2.fastq.gz
ENCFF000RWO	UTA	rep3	K562	CTCF	ftp://hgdownload.cse.ucsc.edu/goldenPath/hg19/encodeDCC/wgEncodeOpenChromChip/wgEncodeOpenChromChipK562CtcfRawDataRep3.fastq.gz
ENCFF001HTO	UW	rep1	K562	CTCF	ftp://hgdownload.cse.ucsc.edu/goldenPath/hg19/encodeDCC/wgEncodeUwTfbs/wgEncodeUwTfbsK562CtcfStdRawDataRep1.fastq.gz
ENCFF001HTP	UW	rep2	K562	CTCF	ftp://hgdownload.cse.ucsc.edu/goldenPath/hg19/encodeDCC/wgEncodeUwTfbs/wgEncodeUwTfbsK562CtcfStdRawDataRep2.fastq.gz
ENCFF000CMM	Broad	rep1	NHEK	CTCF	ftp://hgdownload.cse.ucsc.edu/goldenPath/hg19/encodeDCC/wgEncodeBroadHistone/wgEncodeBroadHistoneNhekCtcfStdRawDataRep1.fastq.gz
ENCFF000CMF	Broad	rep2	NHEK	CTCF	ftp://hgdownload.cse.ucsc.edu/goldenPath/hg19/encodeDCC/wgEncodeBroadHistone/wgEncodeBroadHistoneNhekCtcfStdRawDataRep2.fastq.gz
ENCFF000SCQ	UTA	rep1	NHEK	CTCF	ftp://hgdownload.cse.ucsc.edu/goldenPath/hg19/encodeDCC/wgEncodeOpenChromChip/wgEncodeOpenChromChipNhekCtcfRawDataRep1.fastq.gz
ENCFF000SCV	UTA	rep2	NHEK	CTCF	ftp://hgdownload.cse.ucsc.edu/goldenPath/hg19/encodeDCC/wgEncodeOpenChromChip/wgEncodeOpenChromChipNhekCtcfRawDataRep2.fastq.gz
ENCFF001HVN	UW	rep1	NHEK	CTCF	ftp://hgdownload.cse.ucsc.edu/goldenPath/hg19/encodeDCC/wgEncodeUwTfbs/wgEncodeUwTfbsNhekCtcfStdRawDataRep1.fastq.gz
ENCFF001HVQ	UW	rep2	NHEK	CTCF	ftp://hgdownload.cse.ucsc.edu/goldenPath/hg19/encodeDCC/wgEncodeUwTfbs/wgEncodeUwTfbsNhekCtcfStdRawDataRep2.fastq.gz
ENCFF000OBB	HAIB	rep1	GM12878	POLR2A	ftp://hgdownload.cse.ucsc.edu/goldenPath/hg19/encodeDCC/wgEncodeHaibTfbs/wgEncodeHaibTfbsGm12878Pol2Pcr2xRawDataRep1.fastq.gz
ENCFF000OBE	HAIB	rep2	GM12878	POLR2A	ftp://hgdownload.cse.ucsc.edu/goldenPath/hg19/encodeDCC/wgEncodeHaibTfbs/wgEncodeHaibTfbsGm12878Pol2Pcr2xRawDataRep2.fastq.gz
ENCFF000PEV	HAIB	rep1	HeLa-S3	POLR2A	ftp://hgdownload.cse.ucsc.edu/goldenPath/hg19/encodeDCC/wgEncodeHaibTfbs/wgEncodeHaibTfbsHelas3Pol2Pcr1xRawDataRep1.fastq.gz
ENCFF000PFC	HAIB	rep2	HeLa-S3	POLR2A	ftp://hgdownload.cse.ucsc.edu/goldenPath/hg19/encodeDCC/wgEncodeHaibTfbs/wgEncodeHaibTfbsHelas3Pol2Pcr1xRawDataRep2.fastq.gz
ENCFF000PNM	HAIB	rep1	HepG2	POLR2A	ftp://hgdownload.cse.ucsc.edu/goldenPath/hg19/encodeDCC/wgEncodeHaibTfbs/wgEncodeHaibTfbsHepg2Pol2Pcr2xRawDataRep1.fastq.gz
ENCFF000PNT	HAIB	rep2	HepG2	POLR2A	ftp://hgdownload.cse.ucsc.edu/goldenPath/hg19/encodeDCC/wgEncodeHaibTfbs/wgEncodeHaibTfbsHepg2Pol2Pcr2xRawDataRep2.fastq.gz
ENCFF000PVK	HAIB	rep1	HUVEC	POLR2A	ftp://hgdownload.cse.ucsc.edu/goldenPath/hg19/encodeDCC/wgEncodeHaibTfbs/wgEncodeHaibTfbsHuvecPol2Pcr1xRawDataRep1.fastq.gz
ENCFF000PVP	HAIB	rep2	HUVEC	POLR2A	ftp://hgdownload.cse.ucsc.edu/goldenPath/hg19/encodeDCC/wgEncodeHaibTfbs/wgEncodeHaibTfbsHuvecPol2Pcr1xRawDataRep2.fastq.gz
ENCFF000RPI	UTA	rep1	GM12878	POLR2A	ftp://hgdownload.cse.ucsc.edu/goldenPath/hg19/encodeDCC/wgEncodeOpenChromChip/wgEncodeOpenChromChipGm12878Pol2RawDataRep1.fastq.gz
ENCFF000RPL	UTA	rep2	GM12878	POLR2A	ftp://hgdownload.cse.ucsc.edu/goldenPath/hg19/encodeDCC/wgEncodeOpenChromChip/wgEncodeOpenChromChipGm12878Pol2RawDataRep2.fastq.gz
ENCFF000RTM	UTA	rep1	HeLa-S3	POLR2A	ftp://hgdownload.cse.ucsc.edu/goldenPath/hg19/encodeDCC/wgEncodeOpenChromChip/wgEncodeOpenChromChipHelas3Pol2RawDataRep1.fastq.gz
ENCFF000RTT	UTA	rep2	HeLa-S3	POLR2A	ftp://hgdownload.cse.ucsc.edu/goldenPath/hg19/encodeDCC/wgEncodeOpenChromChip/wgEncodeOpenChromChipHelas3Pol2RawDataRep2.fastq.gz
ENCFF000RUR	UTA	rep1	HepG2	POLR2A	ftp://hgdownload.cse.ucsc.edu/goldenPath/hg19/encodeDCC/wgEncodeOpenChromChip/wgEncodeOpenChromChipHepg2Pol2RawDataRep1.fastq.gz
ENCFF000RUT	UTA	rep2	HepG2	POLR2A	ftp://hgdownload.cse.ucsc.edu/goldenPath/hg19/encodeDCC/wgEncodeOpenChromChip/wgEncodeOpenChromChipHepg2Pol2RawDataRep2.fastq.gz
ENCFF000RUY	UTA	rep3	HepG2	POLR2A	ftp://hgdownload.cse.ucsc.edu/goldenPath/hg19/encodeDCC/wgEncodeOpenChromChip/wgEncodeOpenChromChipHepg2Pol2RawDataRep3.fastq.gz
ENCFF000RVR	UTA	rep1	HUVEC	POLR2A	ftp://hgdownload.cse.ucsc.edu/goldenPath/hg19/encodeDCC/wgEncodeOpenChromChip/wgEncodeOpenChromChipHuvecPol2RawDataRep1.fastq.gz
ENCFF000RVW	UTA	rep2	HUVEC	POLR2A	ftp://hgdownload.cse.ucsc.edu/goldenPath/hg19/encodeDCC/wgEncodeOpenChromChip/wgEncodeOpenChromChipHuvecPol2RawDataRep2.fastq.gz
ENCFF000WBX	SYDH	rep1	GM12878	POLR2A	ftp://hgdownload.cse.ucsc.edu/goldenPath/hg19/encodeDCC/wgEncodeSydhTfbs/wgEncodeSydhTfbsGm12878Pol2RawDataRep1.fastq.gz
ENCFF000WBW	SYDH	rep2	GM12878	POLR2A	ftp://hgdownload.cse.ucsc.edu/goldenPath/hg19/encodeDCC/wgEncodeSydhTfbs/wgEncodeSydhTfbsGm12878Pol2RawDataRep2.fastq.gz
MISSED	SYDH	rep1	HeLa-S3	POLR2A	ftp://hgdownload.cse.ucsc.edu/goldenPath/hg19/encodeDCC/wgEncodeSydhTfbs/wgEncodeSydhTfbsHelas3Pol2RawDataRep1.fastq.gz
MISSED	SYDH	rep2	HeLa-S3	POLR2A	ftp://hgdownload.cse.ucsc.edu/goldenPath/hg19/encodeDCC/wgEncodeSydhTfbs/wgEncodeSydhTfbsHelas3Pol2RawDataRep2.fastq.gz
MISSED	SYDH	rep3	HeLa-S3	POLR2A	ftp://hgdownload.cse.ucsc.edu/goldenPath/hg19/encodeDCC/wgEncodeSydhTfbs/wgEncodeSydhTfbsHelas3Pol2RawDataRep3.fastq.gz
MISSED	SYDH	rep1	HepG2	POLR2A	ftp://hgdownload.cse.ucsc.edu/goldenPath/hg19/encodeDCC/wgEncodeSydhTfbs/wgEncodeSydhTfbsHepg2Pol2RawDataRep2.fastq.gz
MISSED	SYDH	rep2	HepG2	POLR2A	ftp://hgdownload.cse.ucsc.edu/goldenPath/hg19/encodeDCC/wgEncodeSydhTfbs/wgEncodeSydhTfbsHepg2Pol2RawDataRep3.fastq.gz
ENCFF000YBD	SYDH	rep1	HUVEC	POLR2A	ftp://hgdownload.cse.ucsc.edu/goldenPath/hg19/encodeDCC/wgEncodeSydhTfbs/wgEncodeSydhTfbsHuvecPol2RawDataRep1.fastq.gz
ENCFF000YBR	SYDH	rep2	HUVEC	POLR2A	ftp://hgdownload.cse.ucsc.edu/goldenPath/hg19/encodeDCC/wgEncodeSydhTfbs/wgEncodeSydhTfbsHuvecPol2RawDataRep2.fastq.gz
ENCFF000YCV	SYDH	rep3	HUVEC	POLR2A	ftp://hgdownload.cse.ucsc.edu/goldenPath/hg19/encodeDCC/wgEncodeSydhTfbs/wgEncodeSydhTfbsHuvecPol2RawDataRep3.fastq.gz
ENCFF000OHH	HAIB	rep1	GM12878	YY1	ftp://hgdownload.cse.ucsc.edu/goldenPath/hg19/encodeDCC/wgEncodeHaibTfbs/wgEncodeHaibTfbsGm12878Yy1sc281Pcr1xRawDataRep1.fastq.gz
ENCFF000OHO	HAIB	rep2	GM12878	YY1	ftp://hgdownload.cse.ucsc.edu/goldenPath/hg19/encodeDCC/wgEncodeHaibTfbs/wgEncodeHaibTfbsGm12878Yy1sc281Pcr1xRawDataRep2.fastq.gz
ENCFF000WGS	SYDH	rep1	GM12878	YY1	ftp://hgdownload.cse.ucsc.edu/goldenPath/hg19/encodeDCC/wgEncodeSydhTfbs/wgEncodeSydhTfbsGm12878Yy1RawDataRep1.fastq.gz
ENCFF000WGT	SYDH	rep2	GM12878	YY1	ftp://hgdownload.cse.ucsc.edu/goldenPath/hg19/encodeDCC/wgEncodeSydhTfbs/wgEncodeSydhTfbsGm12878Yy1RawDataRep2.fastq.gz
ENCFF000PMZ	HAIB	rep1	HepG2	EP300	ftp://hgdownload.cse.ucsc.edu/goldenPath/hg19/encodeDCC/wgEncodeHaibTfbs/wgEncodeHaibTfbsHepg2P300V0416101RawDataRep1.fastq.gz
ENCFF000PNA	HAIB	rep2	HepG2	EP300	ftp://hgdownload.cse.ucsc.edu/goldenPath/hg19/encodeDCC/wgEncodeHaibTfbs/wgEncodeHaibTfbsHepg2P300V0416101RawDataRep2.fastq.gz
ENCFF000XVT	SYDH	rep1	HepG2	EP300	ftp://hgdownload.cse.ucsc.edu/goldenPath/hg19/encodeDCC/wgEncodeSydhTfbs/wgEncodeSydhTfbsHepg2P300sc582IggrabRawDataRep1.fastq.gz
ENCFF000XVS	SYDH	rep2	HepG2	EP300	ftp://hgdownload.cse.ucsc.edu/goldenPath/hg19/encodeDCC/wgEncodeSydhTfbs/wgEncodeSydhTfbsHepg2P300sc582IggrabRawDataRep2.fastq.gz
ENCFF000QBD	HAIB	rep1	K562	GATA2	ftp://hgdownload.cse.ucsc.edu/goldenPath/hg19/encodeDCC/wgEncodeHaibTfbs/wgEncodeHaibTfbsK562Gata2sc267Pcr1xRawDataRep1.fastq.gz
ENCFF000QBC	HAIB	rep2	K562	GATA2	ftp://hgdownload.cse.ucsc.edu/goldenPath/hg19/encodeDCC/wgEncodeHaibTfbs/wgEncodeHaibTfbsK562Gata2sc267Pcr1xRawDataRep2.fastq.gz
ENCFF000YNY	SYDH	rep1	K562	GATA2	ftp://hgdownload.cse.ucsc.edu/goldenPath/hg19/encodeDCC/wgEncodeSydhTfbs/wgEncodeSydhTfbsK562Gata2RawDataRep1.fastq.gz
ENCFF000YNZ	SYDH	rep2	K562	GATA2	ftp://hgdownload.cse.ucsc.edu/goldenPath/hg19/encodeDCC/wgEncodeSydhTfbs/wgEncodeSydhTfbsK562Gata2RawDataRep2.fastq.gz
